# Supplementary material for: Cymoxanil disrupts RNA synthesis through inhibiting the activity of dihydrofolate reductase
Source: PubMed Central journal article supplement (PMC11111663; doi:10.1038/s41598-024-62563-5), 2024-05-22
Supplement: 41598_2024_62563_MOESM1_ESM.pdf [file 41598_2024_62563_MOESM1_ESM.pdf]

Total RNA

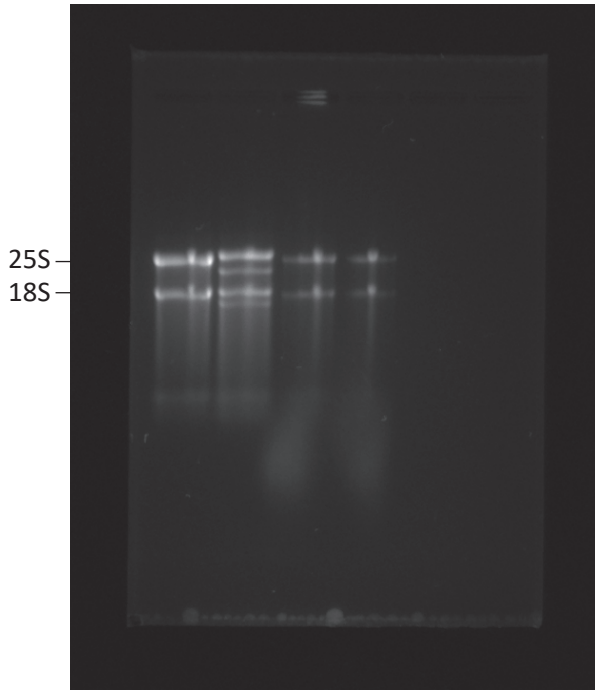

0.0 12.5 25.0 37.5  
Cymoxanil ( $\mu\text{M}$ )
